# Supplementary material
Source: PubMed Central journal article supplement (PMC2148431)

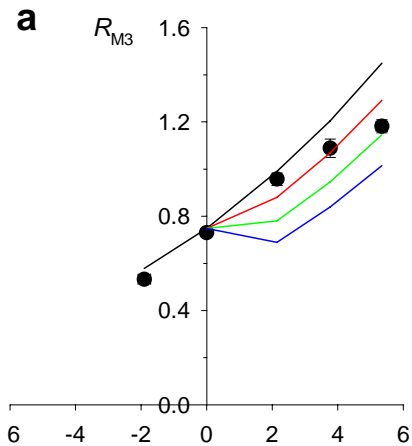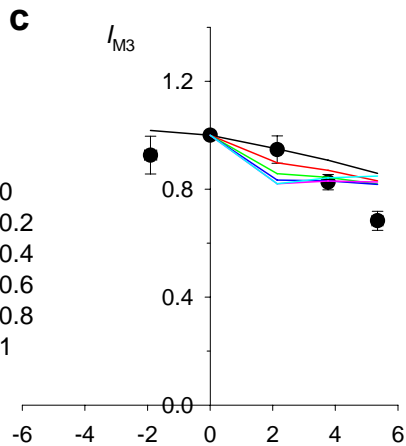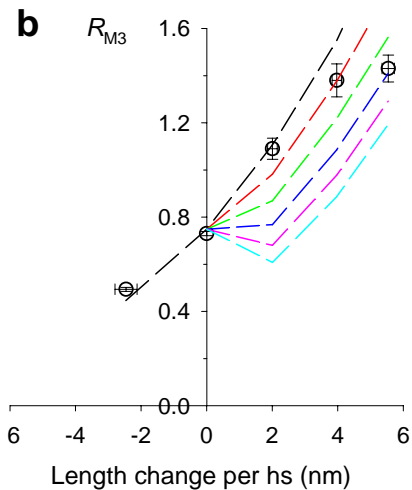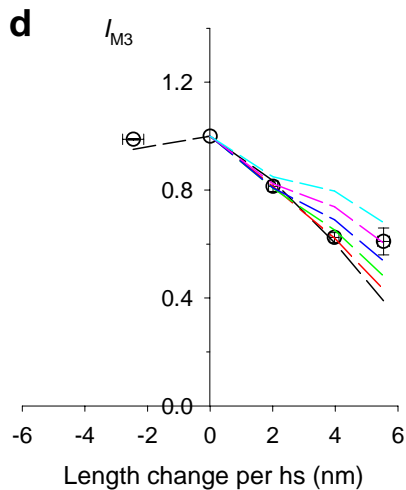

Supplement: pnas_0707626104_1.pdf [file pnas_0707626104_1.pdf]

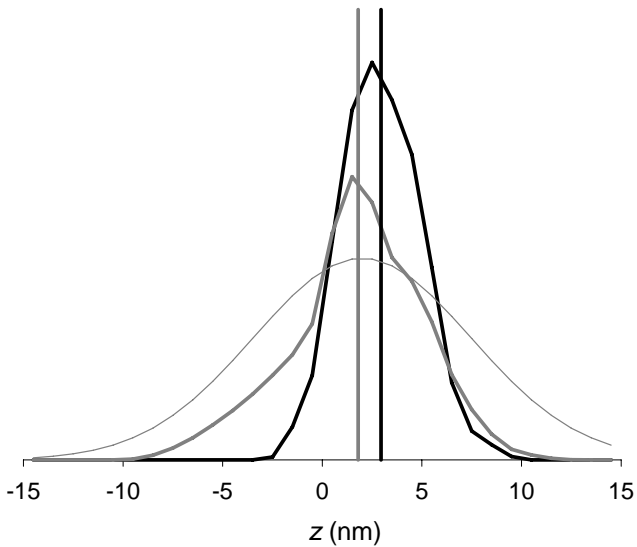

Supplement: pnas_0707626104_2.pdf [file pnas_0707626104_2.pdf]

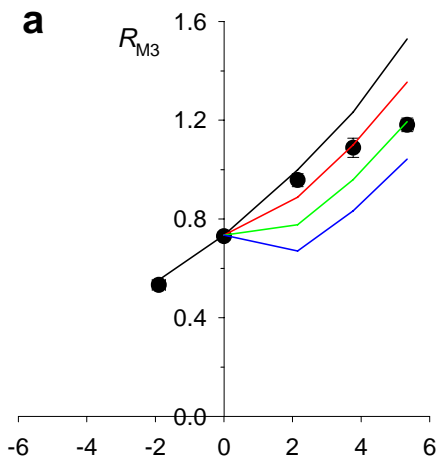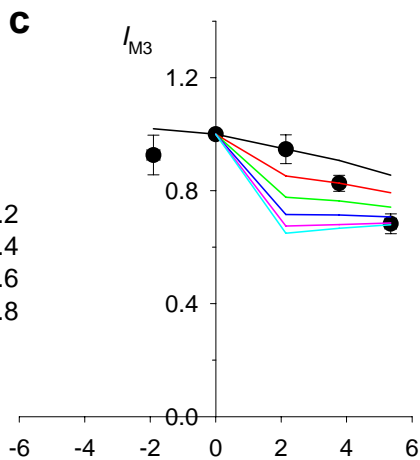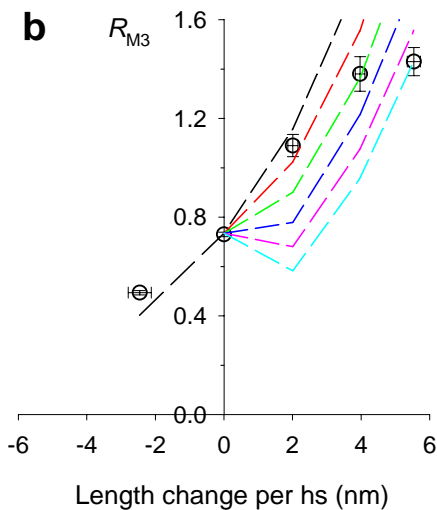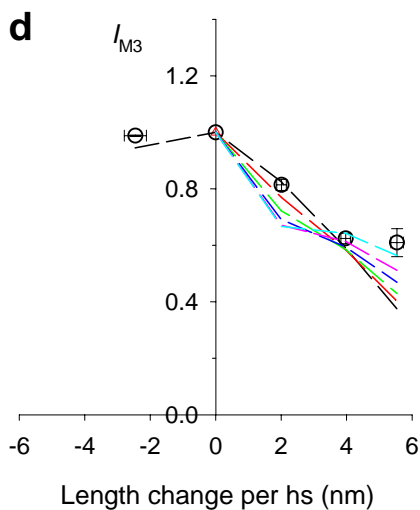

Supplement: pnas_0707626104_3.pdf [file pnas_0707626104_3.pdf]
